# Supplementary material for: Partial Hepatectomy Promotes the Development of KRASG12V-Induced Hepatocellular Carcinoma in Zebrafish
Source: MDPI journal article supplement (doi:10.3390/cancers16101793), 2024-05-08
Supplement: s1 [file s1]

## Article

# Partial Hepatectomy Promotes the Development of KRASG12V-induced Hepatocellular Carcinoma in Zebrafish

Mingkai Zhu <sup>1,2</sup>, Yan Li <sup>1</sup>, Dong Liu <sup>2,\*</sup> and Zhiyuan Gong <sup>1,\*</sup>
**Table S1.** List of primers used in RT-qPCR.

| Genes                       | Forward                 | Reverse               |
|-----------------------------|-------------------------|-----------------------|
| <i>acta2</i>                | TGATGAAGCCGGACCCCTCTA   | AGAAGTGGGCAGTGCAAAGA  |
| <i>ccnb1</i>                | GGTGACTGGACCCCTACTCT    | CCTCGTTGACCCTCACAACA  |
| <i>cdk1</i>                 | CTCTGGGGACCCCTAACAAAT   | CGGATGTGTCATTGCTTGTC  |
| <i>col1a1b</i>              | TGAAATGAGGCGGCCAAAC     | TCCAGCATCCAGTTGACCAC  |
| <i>cybb</i>                 | CCGGAGACTCAGGCTTTTGA    | GTGATAGGATCGTCCTCCGC  |
| <i>fgf13b</i>               | AGAGTGGCATGGCGTTTCC     | ATAGCCACCACTCGTAGCCC  |
| <i>hif1aa</i>               | GATGCTCGTCCACAGAAC      | CACGTCCGAGACTTGATA    |
| <i>kras</i> <sup>G12V</sup> | CGACCACTACCAGCAGAACA    | GCTTTTGCCTACGCCTACAG  |
| <i>lama5</i>                | CCACGGCCAAAGAAGAATGC    | GCGTCACACCTACACTGACA  |
| <i>rps18</i>                | ATACAGCCAGGTCCTTGCTAATG | GTGACGGAGACCACGGTGAG  |
| <i>s100a1</i>               | CCTAATTCCCCACACAGGT     | TTATCCACCAGACGAGGAGCG |
| <i>tgfb1b</i>               | ATAGCAGGTTTGTCCCGCAA    | ATAGGAGCAAGAGCCAGTGC  |

**Table S2.** Genes up/downregulated in both *kras*<sup>+</sup> livers and PH livers.

| Genes Upregulated       | PH vs Sham on Day 1 |            | <i>kras</i> <sup>+</sup> vs WT on Day 5 |          |
|-------------------------|---------------------|------------|-----------------------------------------|----------|
| Gene ID                 | log2FoldChange      | padj       | log2FoldChange                          | padj     |
| <i>fgf13b</i>           | 5.794282            | 9.44E-15   | 4.651961                                | 0.010768 |
| <i>serpinb1</i>         | 2.556894            | 3.63E-07   | 4.677396                                | 1.54E-30 |
| <i>LO018309.1</i>       | 4.527712            | 0.00096065 | 2.839932                                | 2.65E-05 |
| <i>asns</i>             | 2.458471            | 0.00152875 | 1.079289                                | 0.001419 |
| <i>BX571955.2</i>       | 9.060113            | 0.00186814 | 11.93705                                | 1.82E-10 |
| <i>ntd5</i>             | 2.724144            | 0.00189110 | 6.869992                                | 3.36E-34 |
| <i>s100a1</i>           | 6.020058            | 0.00198862 | 3.340291                                | 0.021678 |
| <i>ppp1r15b</i>         | 4.322528            | 0.00486106 | 4.970812                                | 8.99E-13 |
| <i>abcc6b.2</i>         | 1.881603            | 0.00536820 | 1.434609                                | 0.017899 |
| <i>osr1</i>             | 8.69703             | 0.00781708 | 3.384821                                | 0.045604 |
| <i>chst6</i>            | 8.654082            | 0.00974658 | 4.171725                                | 0.001213 |
| <i>si:ch211-286b4.4</i> | 2.234783            | 0.00974658 | 3.26067                                 | 0.0053   |
| <i>hpcal4</i>           | 8.493526            | 0.01597101 | 6.463062                                | 2.63E-14 |
| <i>cers2b</i>           | 2.22468             | 0.02296315 | 1.466948                                | 0.007234 |
| <i>stard10</i>          | 1.711465            | 0.03280682 | 6.676752                                | 1.32E-28 |
| <i>hmg13</i>            | 1.430703            | 0.0356808  | 1.576506                                | 0.01595  |
| Genes Downregulated     | PH vs Sham on Day 1 |            | <i>kras</i> <sup>+</sup> vs WT on Day 5 |          |
| Gene ID                 | log2FoldChange      | padj       | log2FoldChange                          | padj     |
| <i>ceip</i>             | -2.67926            | 4.03E-10   | -3.28211                                | 1.44E-11 |
| <i>cyp7a1</i>           | -3.36883            | 6.15E-10   | -3.49177                                | 0.02243  |
| <i>si:ch211-22d5.2</i>  | -6.67583            | 6.98E-09   | -5.37469                                | 0.008775 |



|                    |          |          |                    |          |          |
|--------------------|----------|----------|--------------------|----------|----------|
|                    |          |          |                    |          |          |
| CU468730.1         | 7.678782 | 7.20E-05 | si:ch211-22d5.2    | -6.67583 | 6.98E-09 |
| tnnt3b             | 9.90009  | 0.00019  | armc2              | -10.907  | 4.62E-08 |
| BX511067.1         | 24.48908 | 0.000226 | si:dkeyp-73d8.9    | -29.4535 | 1.29E-06 |
| sst1.2             | 3.284441 | 0.000226 | CU464134.1         | -3.2615  | 4.00E-06 |
| si:ch211-270n8.1   | 2.023279 | 0.000298 | gnai2b             | -2.4356  | 6.06E-06 |
| atp2a1l            | 9.524161 | 0.000336 | zgc:152753         | -2.40664 | 9.01E-06 |
| cxcl8b.3           | 2.276303 | 0.001025 | pde5aa             | -10.5767 | 9.75E-06 |
| fbkp2              | 1.939463 | 0.001187 | CR318601.1         | -3.59715 | 3.19E-05 |
| cnpv1              | 2.085854 | 0.00141  | mhc2b              | -2.07675 | 8.34E-05 |
| BX322792.1         | 9.088049 | 0.00182  | CU326366.2         | -9.97757 | 0.000226 |
| mvda               | 3.679515 | 0.00182  | prkd4              | -3.55058 | 0.000311 |
| si:dkeyp-107f9.2   | 8.989167 | 0.002371 | cd74a              | -2.24291 | 0.000394 |
| si:dkey-228a15.1   | 1.927204 | 0.00255  | si:ch211-250k18.7  | -2.26293 | 0.00055  |
| dbi                | 1.962446 | 0.00271  | pla2g4ab           | -9.32298 | 0.000582 |
| wu:fd46c06         | 1.722508 | 0.00271  | pcdh1g18           | -22.8478 | 0.000984 |
| si:dkey-105h12.2   | 1.847736 | 0.002782 | zgc:103700         | -1.98876 | 0.001025 |
| hp                 | 3.724809 | 0.003252 | CT867973.2         | -22.755  | 0.001025 |
| anxa2a             | 1.570429 | 0.004061 | itgb5              | -2.252   | 0.001109 |
| crp2               | 2.253436 | 0.004189 | si:ch211-181d7.1   | -4.0402  | 0.001669 |
| CU570782.1         | 8.821518 | 0.005287 | cdc42bpab          | -3.25991 | 0.002118 |
| sox4b              | 1.820116 | 0.00579  | cyp27b1            | -2.70079 | 0.002254 |
| agr2               | 2.5585   | 0.005827 | ccl36.1            | -2.13146 | 0.00255  |
| hmgcs1             | 3.479807 | 0.006045 | rec8b              | -8.91938 | 0.00255  |
| npsn               | 2.313444 | 0.006045 | ctss2.2            | -2.5844  | 0.002582 |
| hbl2               | 4.208621 | 0.007161 | mhc2a              | -3.50821 | 0.003349 |
| AL845362.1         | 9.060736 | 0.007182 | si:dkey-11f4.20    | -3.0613  | 0.003398 |
| acbd7              | 2.115806 | 0.007461 | anxa3b             | -1.6439  | 0.003466 |
| ppib               | 1.51518  | 0.007848 | fblim1             | -2.14767 | 0.00353  |
| si:ch211-214j24.15 | 3.114974 | 0.008314 | c1galt1a           | -8.80267 | 0.003906 |
| sb:cb37            | 1.539925 | 0.008669 | fat2               | -5.45327 | 0.0043   |
| krtcap2            | 1.515832 | 0.008884 | si:ch211-79k12.1   | -1.58443 | 0.00433  |
| stk40              | 2.112158 | 0.009152 | thbs4b             | -3.35822 | 0.00453  |
| acat2              | 2.200173 | 0.009556 | CU855930.2         | -8.78554 | 0.00453  |
| CR626907.3         | 1.408087 | 0.009747 | cd74b              | -1.94742 | 0.005193 |
| pvalb3             | 3.629958 | 0.010253 | cdo1               | -1.81995 | 0.00558  |
| CABZ01061592.1     | 4.083059 | 0.010342 | si:dkey-9c18.3     | -9.41301 | 0.00558  |
| postnb             | 2.102819 | 0.013176 | slc27a2a           | -1.73248 | 0.005627 |
| si:zf0s-1897c11.1  | 8.932785 | 0.014391 | CR753876.1         | -1.61026 | 0.006045 |
| nrg2b              | 8.527183 | 0.014708 | si:ch211-217k17.11 | -1.97659 | 0.006906 |
| alg5               | 1.563213 | 0.016356 | krt18a.2           | -2.00589 | 0.00704  |
| mdkb               | 1.790627 | 0.016656 | zgc:194101         | -3.23023 | 0.007161 |
| rpn1               | 1.363031 | 0.016656 | ctsbb              | -8.7534  | 0.007182 |
| cyp3c4             | 2.158782 | 0.019001 | rrp1               | -1.89528 | 0.008669 |
| zgc:123103         | 2.447353 | 0.019158 | cyp2k6             | -2.93425 | 0.00941  |
| ost4               | 1.472512 | 0.022551 | si:busm1-194e12.11 | -2.14172 | 0.009726 |
| cars1              | 1.830103 | 0.022933 | si:dkey-27d5.3     | -8.60835 | 0.0099   |
| ebp                | 3.467681 | 0.022963 | blk                | -3.49857 | 0.012364 |

|                          |          |          |                        |          |          |
|--------------------------|----------|----------|------------------------|----------|----------|
|                          |          |          |                        |          |          |
| <i>BX323564.1</i>        | 3.226513 | 0.026413 | <i>cxcl11.6</i>        | -4.55238 | 0.012364 |
| <i>myhz1.1</i>           | 5.348327 | 0.027891 | <i>FP236331.1</i>      | -2.44879 | 0.015941 |
| <i>slc1a4</i>            | 4.021798 | 0.031494 | <i>BX323596.2</i>      | -3.52788 | 0.016751 |
| <i>CU469577.1</i>        | 1.725836 | 0.031691 | <i>CABZ01111959.1</i>  | -8.46499 | 0.019001 |
| <i>si:dkey-183n20.15</i> | 1.867609 | 0.034457 | <i>CABZ01073795.1</i>  | -3.10266 | 0.019158 |
| <i>slc43a3b</i>          | 1.866646 | 0.034457 | <i>slc8a4b</i>         | -5.56656 | 0.019158 |
| <i>si:ch211-212c13.8</i> | 1.564293 | 0.035681 | <i>cacna1aa</i>        | -8.59395 | 0.023104 |
| <i>lyve1a</i>            | 2.403602 | 0.038219 | <i>cyp2r1</i>          | -1.65699 | 0.024871 |
| <i>rnd2</i>              | 2.608239 | 0.04061  | <i>plekhg6</i>         | -8.32129 | 0.0309   |
| <i>CABZ01079192.1</i>    | 2.004205 | 0.04061  | <i>zfp36l1b</i>        | -1.56347 | 0.032139 |
| <i>tmem263</i>           | 1.370816 | 0.04061  | <i>ptk2ab</i>          | -1.61247 | 0.032807 |
| <i>chia.6</i>            | 1.425481 | 0.041387 | <i>loxl4</i>           | -2.12842 | 0.034457 |
| <i>plppr5a</i>           | 8.226123 | 0.045582 | <i>irflb</i>           | -2.56474 | 0.035471 |
| <i>sinhcaf</i>           | 1.424048 | 0.046413 | <i>proca</i>           | -1.26949 | 0.035681 |
| <i>nkx6.3</i>            | 2.218194 | 0.047059 | <i>epob</i>            | -4.67739 | 0.035681 |
| <i>si:ch73-44m9.5</i>    | 2.639637 | 0.049447 | <i>zgc:194246</i>      | -8.63239 | 0.035901 |
|                          |          |          | <i>dock11</i>          | -2.07097 | 0.04061  |
|                          |          |          | <i>si:dkey-28k24.2</i> | -2.61835 | 0.04061  |
|                          |          |          | <i>cxcl11.6</i>        | -4.53957 | 0.045487 |
|                          |          |          | <i>tnikb</i>           | -1.71311 | 0.046006 |
|                          |          |          | <i>tspan2a</i>         | -3.72472 | 0.046381 |
|                          |          |          | <i>nitr12</i>          | -8.15367 | 0.046396 |
|                          |          |          | <i>zgc:152658</i>      | -8.1592  | 0.04689  |
|                          |          |          | <i>dus3l</i>           | -1.47694 | 0.04827  |
|                          |          |          | <i>zgc:174354</i>      | -8.20838 | 0.048961 |

**A**

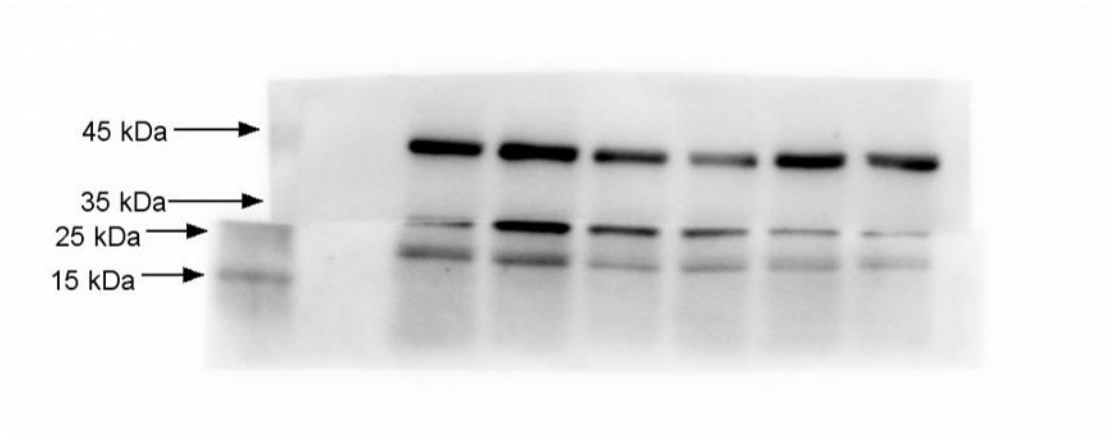

**B**

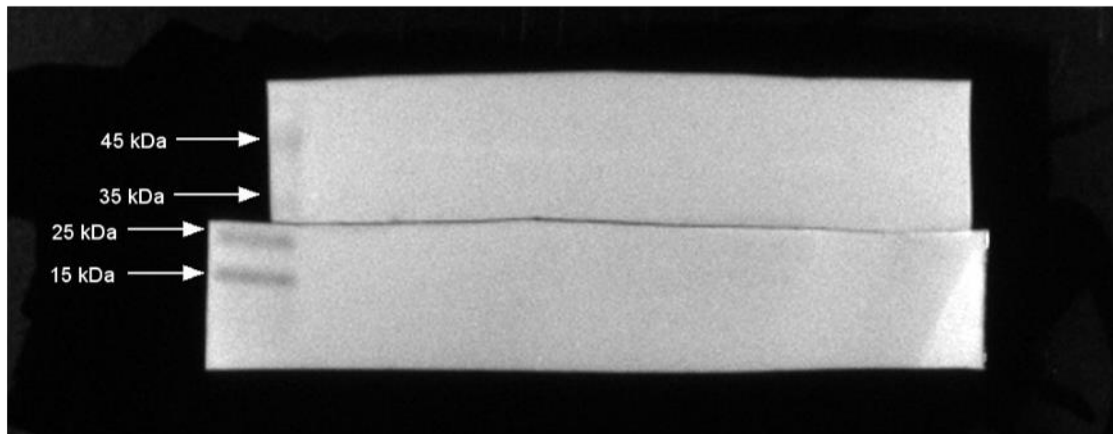

**Figure S1. Uncropped images of S100A1 blots. (A)** The image of the membrane of S100A1 blots under UV light. The membrane was cut into two strips. The upper strip was stained with the anti-β-actin antibody, while the lower strip was stained with the anti-S100A1 antibody. **(B)** The image of the membrane in **(A)** under white light.
